# Supplementary material for: Changes of Resurgent Na+ Currents in the Nav1.4 Channel Resulting from an SCN4A Mutation Contributing to Sodium Channel Myotonia
Source: MDPI journal article supplement (doi:10.3390/ijms21072593), 2020-04-08
Supplement: s1 [file s1]

## Supplementary materials

*Article*

### **Changes of resurgent Na<sup>+</sup> currents in the Na<sub>v</sub>1.4 channel resulting from an *SCN4A* mutation contributing to sodium channel myotonia**

Chiung-Wei Huang,<sup>1</sup> Hsing-Jung Lai,<sup>2,3</sup> Pi-Chen Lin,<sup>4</sup> Ming-Jen Lee<sup>2, 5 \*</sup>

- <sup>1.</sup> Institute of Physiology, Kaohsiung Medical University, Kaohsiung, Taiwan; g10054b@ms51.hinet.net
- <sup>2.</sup> Department of Neurology, National Taiwan University Hospital, Taipei, Taiwan; mjlee@ntu.edu.tw
- <sup>3.</sup> Department of Neurology, National Taiwan University Hospital Jinshan Branch, New Taipei City, Taiwan; i5492111@gmail.com
- <sup>4.</sup> Division of Endocrinology and Metabolism, Department of Internal Medicine, Kaohsiung Medical University Hospital, Kaohsiung Medical University, Kaohsiung, Taiwan; pichli@kmu.edu.tw
- <sup>5.</sup> Department of Neurology, National Taiwan University Hospital Yunlin Branch, Yunlin, Taiwan; mjlee@ntu.edu.tw

\* Correspondence: mjlee@ntu.edu.tw; Tel.: +886 2 23123456 ext 65342

Figure S1

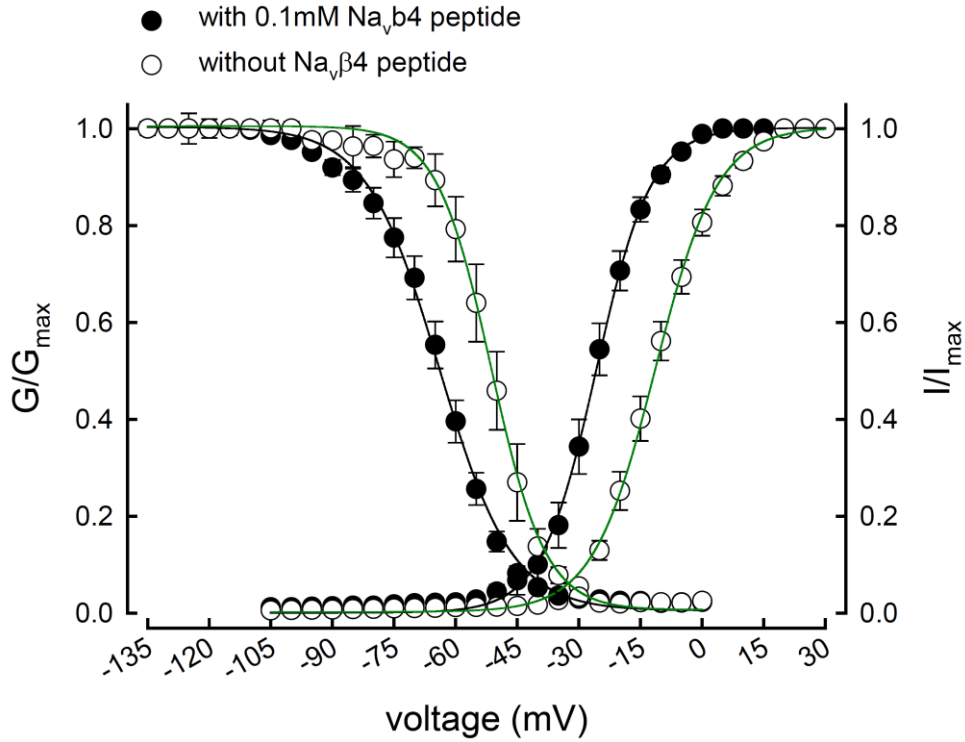

**Figure S1. The activation and inactivation curves of the WT Na<sub>v</sub>1.4 channel with and without of the 0.1mM Na<sub>v</sub>β4 peptide**

The activation and inactivation curves for each cells are fitted with Boltzmann functions, and the cumulative results for  $V_h$  are  $-25.79 \pm 1.5$  mV and  $-11.43 \pm 1.21$  mV with and without the 0.1 mM Na<sub>v</sub>β4 peptides, respectively ( $n=9$ ;  $p<0.05$ ), and  $k$  are  $6.67 \pm 0.43$  and  $7.59 \pm 0.34$  with and without the 0.1 mM Na<sub>v</sub>β4 peptides for the inactivation curve, respectively ( $n=9$ ; no significant difference). For the inactivation curves, the  $V_h$  are  $-63.99 \pm 2.17$  mV and  $-51.35 \pm 1.51$  mV with and without the 0.1 mM Na<sub>v</sub>β4 peptides, respectively ( $n=9$ ;  $p<0.05$ ), and  $k$  are  $-8.93 \pm 0.33$  and  $-6.62 \pm 0.38$  with and without the Na<sub>v</sub>β4 peptides, respectively ( $n=9$ ; no significant difference).

Figure S2

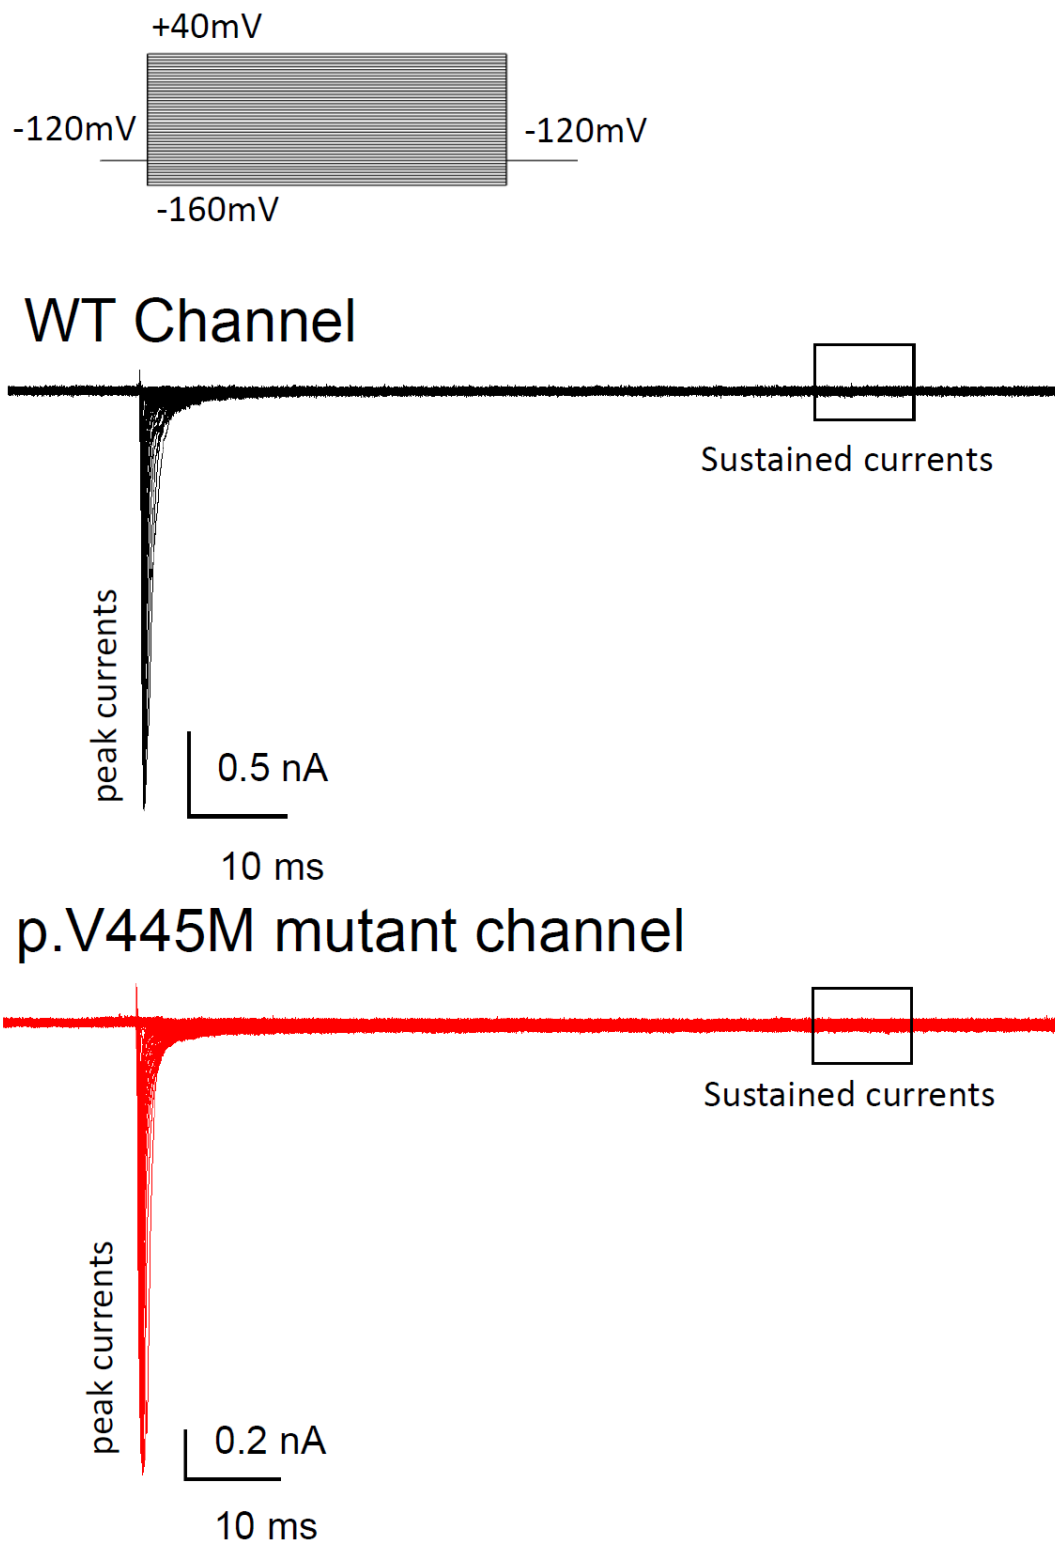

Figure S2. Sample sweeps shows the peak currents and sustained currents in WT and p.V445M mutant Na<sub>v</sub>1.4 channels

Sample sweeps traces recorded from CHO-K1 cells expressing WT Nav1.4 and p.V445M mutant channels in response to activation stimulation protocol (~100 ms pulse). Sustained currents are seen as current remaining at the end of the 90-95 ms of stimulus duration. Note that the sustained currents are larger in the p.V445M mutant Nav1.4 channel compared to the WT channel.
